# Supplementary material for: Improvements of a low-cost CO 2 commercial nondispersive near-infrared (NDIR) sensor for unmanned aerial vehicle (UAV) atmospheric mapping applications
Source: Copernicus journal article supplement (doi:10.5194/amt-15-4431-2022), 2022-08-02
Supplement: Supplementary file 1 [file amt-15-4431-2022-supplement.pdf]

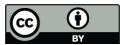

*Supplement of*

**Improvements of a low-cost CO<sub>2</sub> commercial nondispersive near-infrared (NDIR) sensor for unmanned aerial vehicle (UAV) atmospheric mapping applications**

**Yunsong Liu et al.**

*Correspondence to:* Yunsong Liu ([yunsong.liu@lsce.ipsl.fr](mailto:yunsong.liu@lsce.ipsl.fr))

The copyright of individual parts of the supplement might differ from the article licence.

Supplement of

# Improvements of a low-cost CO<sub>2</sub> commercial NDIR sensor for UAV atmospheric mapping applications

Liu et al.

Correspondence to: Yunsong Liu (yunsong.liu@lsce.ipsl.fr)

## Figures and pictures

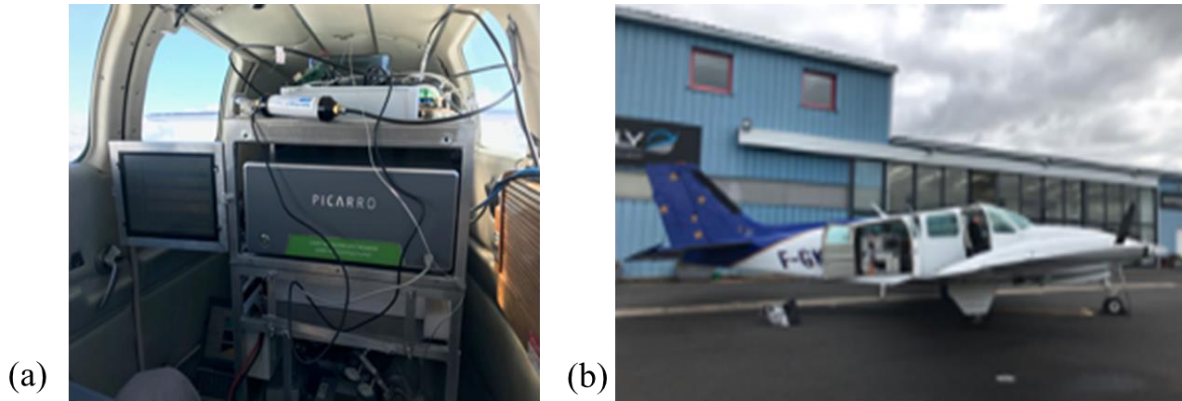

Figure S1 the setup of the system onboard a small aircraft (a) and the manned aircraft platform Beechcraft Baron 58 (b).

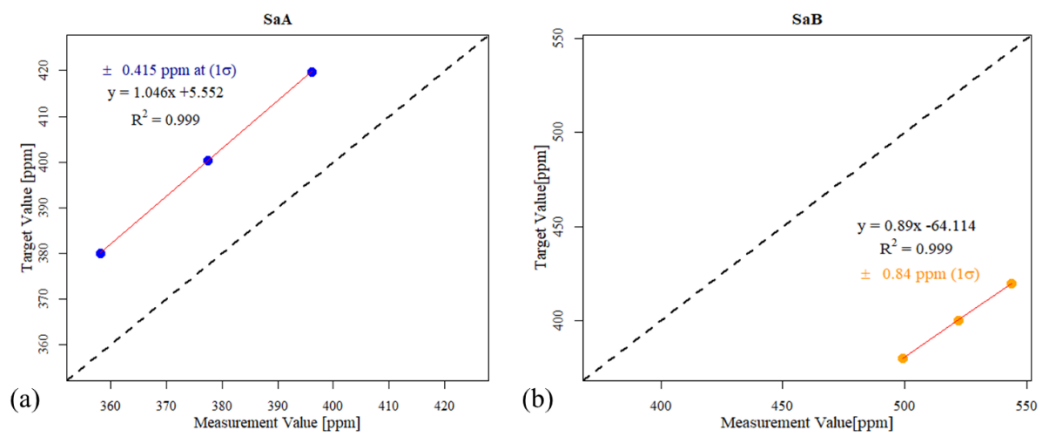

Figure S2 Calibration linear fits calculated for SaA (a) and SaB (b).

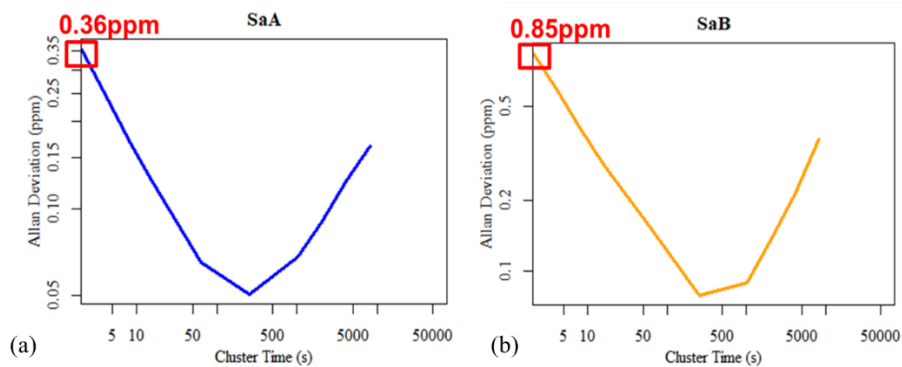

Figure S3 Allan deviation test results for SaA (a) and SaB (b).

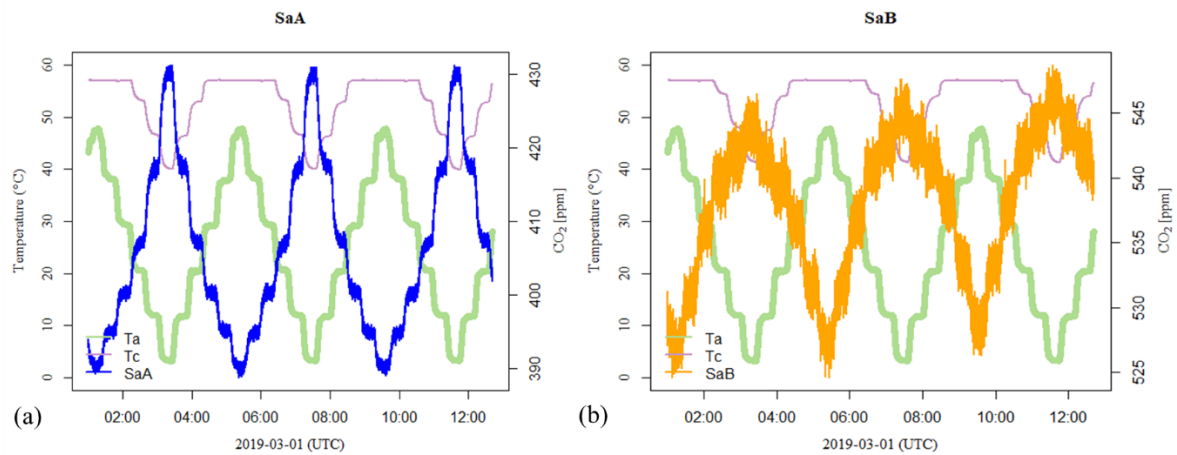

Figure S4 Temperature sensitivity test diagrams, (a) shows the time series of chamber temperature, the sensor cell temperature of SaA and CO<sub>2</sub> readings from SaA; (b) shows the time series of chamber temperature, the sensor cell temperature of SaB and CO<sub>2</sub> readings from SaB.

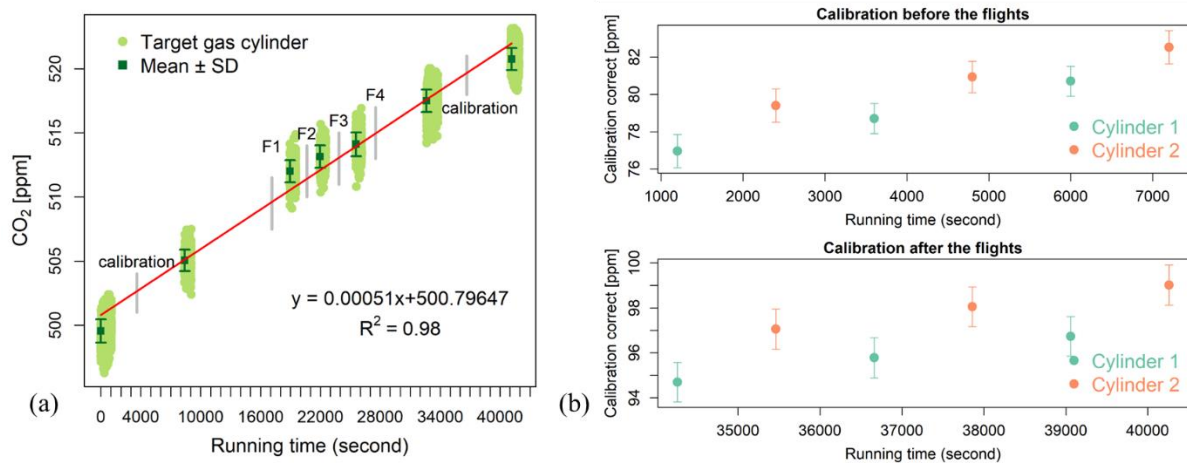

Figure S5 (a) the evolution of target cylinder measurements for SaB and the red line is the linear regression of CO<sub>2</sub> (ppm) against time; (b) presents the calibrations before and after the flights.
